# Supplementary material for: Outpatient Antibiotic Prescribing for Acute Respiratory Infections During Influenza Seasons
Source: PubMed Central journal article supplement (PMC6324415; doi:10.1001/jamanetworkopen.2018.0243), 2018-06-08
Supplement: jamanetwopen-1-e180243-s001.pdf [file jamanetwopen-1-e180243-s001.pdf]

## Supplementary Online Content

Havers FP, Hicks LA, Chung JR, et al. Outpatient antibiotic prescribing for acute respiratory infections during influenza seasons. *JAMA Netw Open*. 2018;1(2):e180243.  
doi:10.1001/jamanetworkopen.2018.0243

**eTable 1.** Diagnostic Categories by Tier With Corresponding *International Classification of Diseases, Ninth Revision (ICD-9)* Diagnosis Codes

**eTable 2.** Antibiotic Selection Among Those With an *International Classification of Diseases, Ninth Revision (ICD-9)* Diagnosis Code for Pharyngitis, Sinusitis, and Suppurative Otitis Media Among Those Prescribed Antibiotics

**eFigure 1.** Predictors of Antibiotic Prescribing Among Persons With Laboratory-Confirmed Influenza and Who Sought Care at Ambulatory Care Settings Associated With 5 Institutions, US Influenza Vaccine Effectiveness Network, 2013-2014 and 2014-2015 Influenza Seasons

**eFigure 2.** Number of Enrollees With Acute Respiratory Infections Defined by Cough  $\leq 7$  Days' Duration, Selected *ICD-9* Diagnostic Codes, by Antibiotic Prescribing Status

**eFigure 3.** Antibiotic Prescribing Among Those With an *International Classification of Diseases, Ninth Revision (ICD-9)* Diagnosis Code for Pharyngitis, by Group A Streptococcus Testing Status, 2014-2015 Influenza Season

This supplementary material has been provided by the authors to give readers additional information about their work.

**eTable 1.** Diagnostic categories by tier<sup>a</sup> with corresponding *International Classification of Diseases, Ninth Revision (ICD-9)* diagnosis codes. Adapted from Fleming-Dutra, et al.,<sup>2</sup> and Shapiro, et al.<sup>14</sup>

| Diagnosis                                                      | Corresponding ICD-9CM codes                                                                                                                                                                                                                                                                                                                                                                                                                                                               |
|----------------------------------------------------------------|-------------------------------------------------------------------------------------------------------------------------------------------------------------------------------------------------------------------------------------------------------------------------------------------------------------------------------------------------------------------------------------------------------------------------------------------------------------------------------------------|
| <b>Tier 1 diagnoses: Antibiotics almost always indicated</b>   |                                                                                                                                                                                                                                                                                                                                                                                                                                                                                           |
| Pneumonia                                                      | 481 Pneumococcal pneumonia [ <i>Streptococcus pneumoniae</i> pneumonia], 482 Other bacterial pneumonia, 483 Pneumonia due to other specified organism, 484 Pneumonia in infectious diseases classified elsewhere, 485 Bronchopneumonia, organism unspecified, 486 Pneumonia, organism unspecified                                                                                                                                                                                         |
| Miscellaneous bacterial infections                             | 010-018, 020-027, 030-033, 036-041, 080-104, 130-139, 320-323, 383, 475 Various named infections including tuberculosis, zoonotic bacterial diseases, diphtheria, pertussis, rickettsial and venereal diseases, meningitis, mastoiditis,                                                                                                                                                                                                                                                  |
| Urinary tract infections (UTI) (excluded) <sup>b</sup>         | 590.1, 590.2, 590.8, 590.9, 595.0, 595.9, 599.0: Acute pyelonephritis, renal abscess, other pyelonephritis/pyelonephrosis, kidney infection (unspecified), acute cystitis, cystitis (unspecified), UTI (unspecified)                                                                                                                                                                                                                                                                      |
| <b>Tier 2 diagnoses: Antibiotics may be indicated</b>          |                                                                                                                                                                                                                                                                                                                                                                                                                                                                                           |
| Pharyngitis                                                    | 462 Acute pharyngitis, 463 Acute tonsillitis, 034 Streptococcal sore throat and scarlet fever                                                                                                                                                                                                                                                                                                                                                                                             |
| Sinusitis                                                      | 461 Acute sinusitis, 473 Chronic sinusitis                                                                                                                                                                                                                                                                                                                                                                                                                                                |
| Suppurative otitis media                                       | 382 Suppurative and unspecified otitis media                                                                                                                                                                                                                                                                                                                                                                                                                                              |
| Acne (excluded) <sup>b</sup>                                   | 706.0, 706.1 Acne, including vulgaris and varioliformis                                                                                                                                                                                                                                                                                                                                                                                                                                   |
| Gastrointestinal infections (excluded) <sup>b</sup>            | 001-009, 787, 789 Intestinal infectious diseases, symptoms involving the abdomen or digestive system                                                                                                                                                                                                                                                                                                                                                                                      |
| Skin, cutaneous and mucosal infections (excluded) <sup>b</sup> | 680-686, 035, 110-111, 704.8, 728.0, 611.0, 771.5, 728.86, 380.0-380.1 Includes cellulitis, carbuncle/furuncle, impetigo, lymphadenitis, erysipelas, dermatophytosis, folliculitis, myositis, mastitis, necrotizing fasciitis, infective otitis externa                                                                                                                                                                                                                                   |
| <b>Tier 3 diagnoses: Antibiotics not indicated</b>             |                                                                                                                                                                                                                                                                                                                                                                                                                                                                                           |
| Asthma, allergy                                                | 493 Asthma, 477 Allergic rhinitis, 995.3 Allergy, unspecified                                                                                                                                                                                                                                                                                                                                                                                                                             |
| Bronchitis, bronchiolitis                                      | 490 Bronchitis, not specified as acute or chronic, 466.0 Acute bronchitis, 466.1 bronchiolitis, **Excludes visits which included a diagnosis of chronic bronchitis (491), emphysema (492), or COPD (496) or patients who had a one of these diagnosis codes within the preceding 12 months.                                                                                                                                                                                               |
| Influenza                                                      | 487 Influenza, 488 Influenza due to identified avian influenza virus                                                                                                                                                                                                                                                                                                                                                                                                                      |
| Miscellaneous other infections                                 | 042, 045-049, 050-059, 070-079, 112-129: Human immunodeficiency virus (HIV) infection, poliomyelitis and other non-arthropod-borne viral diseases and prion disease of central nervous system, viral hepatitis, mumps, coxsackie virus, viral disease accompanied by exanthema, mycoses, helminthiasis                                                                                                                                                                                    |
| Non-suppurative otitis media                                   | 381: Non-suppurative otitis media and Eustachian tube disorders                                                                                                                                                                                                                                                                                                                                                                                                                           |
| Other gastrointestinal conditions                              | 520-579 Other conditions of the digestive system, not already included under gastrointestinal infections                                                                                                                                                                                                                                                                                                                                                                                  |
| Other skin, cutaneous and mucosal conditions                   | 690-698, 700-709, 870-897, 910-919, 940-949, 360-379, 380-389 (excl 380.0-380.1), 782, 785.4, 785.6: Skin, cutaneous and mucosal conditions not already categorized as skin, cutaneous and mucosal infections: includes inflammatory and other skin conditions, open wounds, superficial injuries, burns, diseases of the eye/adnexa, ear diseases other than otitis media and mastoiditis, symptoms of skin/integumentary tissues (excluding acne), gangrene, enlargement of lymph nodes |

|                                         |                                                                                                                                                                                                                                                                                                                    |
|-----------------------------------------|--------------------------------------------------------------------------------------------------------------------------------------------------------------------------------------------------------------------------------------------------------------------------------------------------------------------|
| Other genitourinary conditions          | 580-629, 788.1 (excluding UTI codes above): Other genitourinary codes not already categorized as UTI, Other conditions of the genitourinary system, symptoms involving urinary system (including dysuria)                                                                                                          |
| Viral pneumonia                         | 480: Viral pneumonia                                                                                                                                                                                                                                                                                               |
| Viral upper respiratory infection (URI) | 460: Acute nasopharyngitis [common cold], 464 Acute laryngitis and tracheitis, 465 Acute upper respiratory infections of multiple or unspecified sites, 786.2 Cough                                                                                                                                                |
| Other respiratory conditions            | All remaining respiratory conditions (460-519) not coded above and 786.0-786.1, 786.3-786.4: Includes chronic bronchitis and bronchitis with a 2 <sup>nd</sup> or 3 <sup>rd</sup> diagnosis of chronic bronchitis, emphysema and COPD; other respiratory conditions; dyspnea; stridor; hemoptysis; abnormal sputum |
| All other codes not listed elsewhere    | All remaining codes not listed elsewhere                                                                                                                                                                                                                                                                           |

<sup>a</sup> In assigning each visit a single diagnosis, priority was given to Tier 1 diagnoses, then Tier 2 diagnoses, then Tier 3 diagnoses.

<sup>b</sup> Patients with ICD-9 codes for non-respiratory conditions for which antibiotics are almost always indicated (Tier 1) or may be indicated (Tier 2) were excluded from the analysis.

**eTable 2.** Antibiotic selection<sup>a</sup> among those with an International Classification of Diseases, Ninth Revision (ICD-9) diagnosis code for pharyngitis, sinusitis and suppurative otitis media among those prescribed antibiotics.

|                                 | All ages<br>n (%) | Adult<br>n (%) | Pediatrics<br>n (%) |
|---------------------------------|-------------------|----------------|---------------------|
| <b>Pharyngitis</b>              | 1000              | 561            | 439                 |
| First-line antibiotics          | 593 (59)          | 276 (49)       | 317 (72)            |
| Amoxicillin                     | 496 (50)          | 205 (37)       | 291 (66)            |
| Penicillin                      | 97 (10)           | 71 (13)        | 26 (6)              |
| Non first-line antibiotics      | 407 (41)          | 285 (51)       | 122 (28)            |
| Amoxicillin-clavulanate         | 60 (6)            | 46 (8)         | 14 (3)              |
| Macrolides                      | 229 (23)          | 159 (28)       | 70 (16)             |
| Fluoroquinolones                | 11 (1)            | 11 (2)         | 0 (0)               |
| Broad-spectrum cephalosporins   | 23 (2)            | 9 (2)          | 14 (3)              |
| Tetracycline antibiotics        | 20 (2)            | 20 (2)         | 0 (0)               |
| Other                           | 64 (6)            | 40 (6)         | 24 (5)              |
| <b>Sinusitis</b>                | 1385              | 1193           | 192                 |
| First-line antibiotics          | 804 (58)          | 671 (58)       | 133 (69)            |
| Amoxicillin                     | 538 (39)          | 431 (36)       | 107 (56)            |
| Amoxicillin-clavulanate         | 266 (19)          | 240 (20)       | 26 (14)             |
| Non first-line antibiotics      | 581 (42)          | 522 (44)       | 59 (31)             |
| Macrolides                      | 365 (26)          | 325 (27)       | 40 (21)             |
| Fluoroquinolone                 | 41 (3)            | 41 (3)         | 0 (0)               |
| Broad-spectrum cephalosporins   | 44 (3)            | 29 (2)         | 15 (8)              |
| Tetracycline antibiotics        | 80 (6)            | 80 (7)         | 0 (0)               |
| Other                           | 51 (4)            | 47 (4)         | 4 (2)               |
| <b>Suppurative otitis media</b> | 1,055             | 174            | 881                 |
| First-line antibiotics          | 841 (80)          | 124 (71)       | 717 (81)            |
| Amoxicillin                     | 729 (69)          | 91 (52)        | 638 (72)            |
| Amoxicillin-clavulanate         | 112 (11)          | 33 (19)        | 79 (9)              |
| Non first-line antibiotics      |                   |                |                     |
| Macrolides                      | 92 (9)            | 30 (17)        | 62 (7)              |
| Broad-spectrum cephalosporins   | 98 (9)            | 4 (2)          | 94 (11)             |
| Fluoroquinolones                | 5 (1)             | 4 (2)          | 1 (0)               |
| Other                           | 19 (7)            | 12 (2)         | 7 (1)               |

<sup>a</sup> Identification of first-line antibiotics as previously described: Hersh AL, Fleming-Dutra KE, Shapiro DJ, Hyun DY, Hicks LA, Outpatient Antibiotic Use Target-Setting W. Frequency of First-line Antibiotic Selection Among US Ambulatory Care Visits for Otitis Media, Sinusitis, and Pharyngitis. *JAMA internal medicine*. 2016.

**eFigure 1.** Predictors of antibiotic prescribing among persons with laboratory-confirmed influenza and who sought care at ambulatory care settings associated with 5 institutions, US Influenza Vaccine Effectiveness Network, 2013-2014 and 2014-2015 influenza seasons.

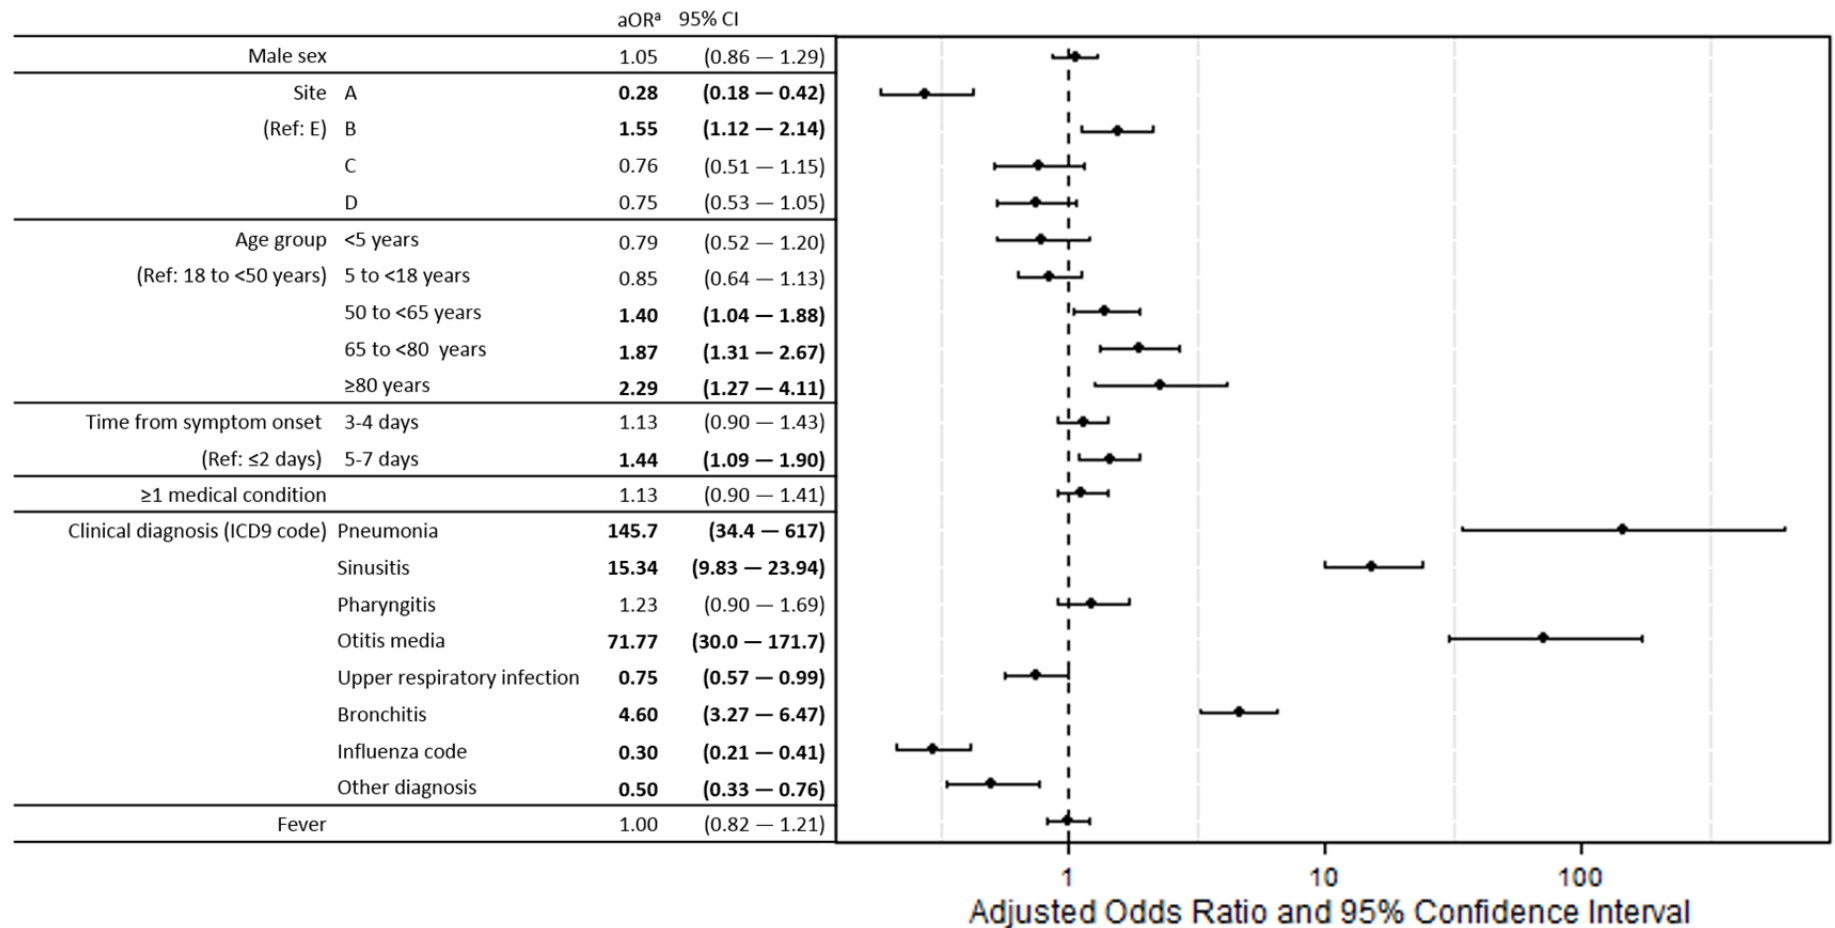

<sup>a</sup> aOR: Adjusted odds ratio. Ref: Reference value. Note: Influenza code: Indicates an International Classification of Diseases, Ninth Revision (ICD-9) code diagnosis of influenza, not reverse transcription polymerase chain reaction (RT-PCR) confirmation of influenza, which was performed on all enrollees for research purposes only.

**eFigure 2.** Number of enrollees with acute respiratory infections defined by cough  $\leq 7$  days' duration, selected ICD-9 diagnostic codes, by antibiotic prescribing status.

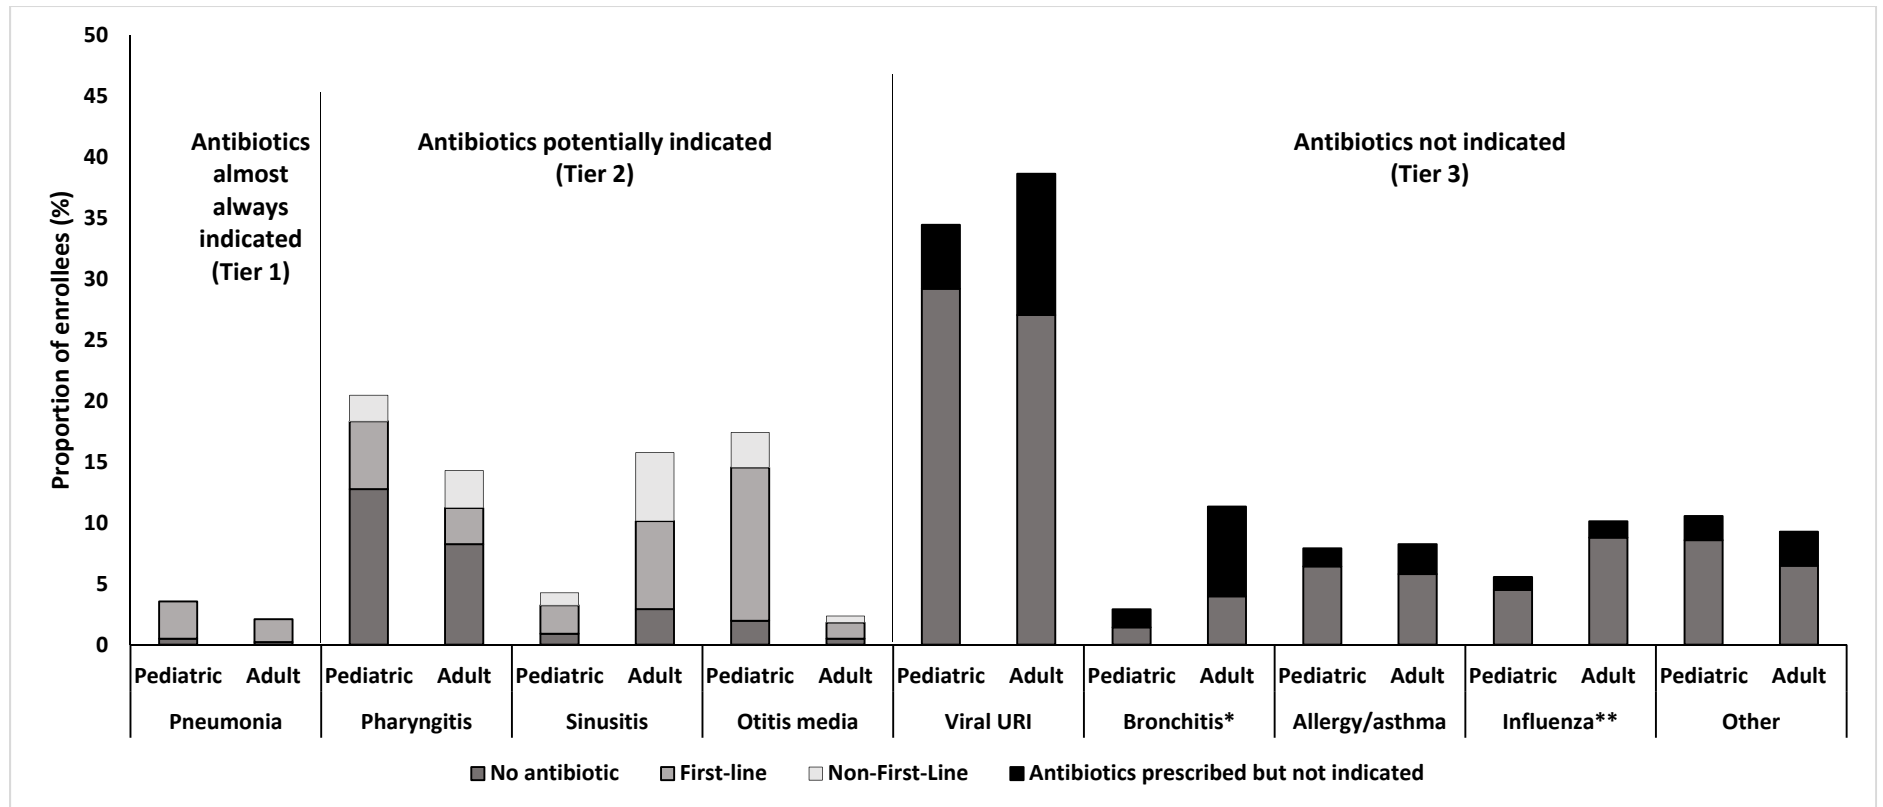

\* Patients with a history of chronic obstructive pulmonary disease (COPD) or a visit diagnosis code for COPD were excluded from the analysis of bronchitis.

\*\*Influenza: Indicates an ICD9 code diagnosis of influenza, not RT-PCR-confirmation of influenza which was performed for research purposes only.

Identification of first-line antibiotics as previously described: Hersh AL, Fleming-Dutra KE, Shapiro DJ, Hyun DY, Hicks LA, Outpatient Antibiotic Use Target-Setting W. Frequency of First-line Antibiotic Selection Among US Ambulatory Care Visits for Otitis Media, Sinusitis, and Pharyngitis. *JAMA internal medicine*. 2016.

**eFigure 3.** Antibiotic prescribing among those with an *International Classification of Diseases, Ninth Revision (ICD-9)* diagnosis code for pharyngitis, by Group A streptococcus testing status, 2014-2015 influenza season.

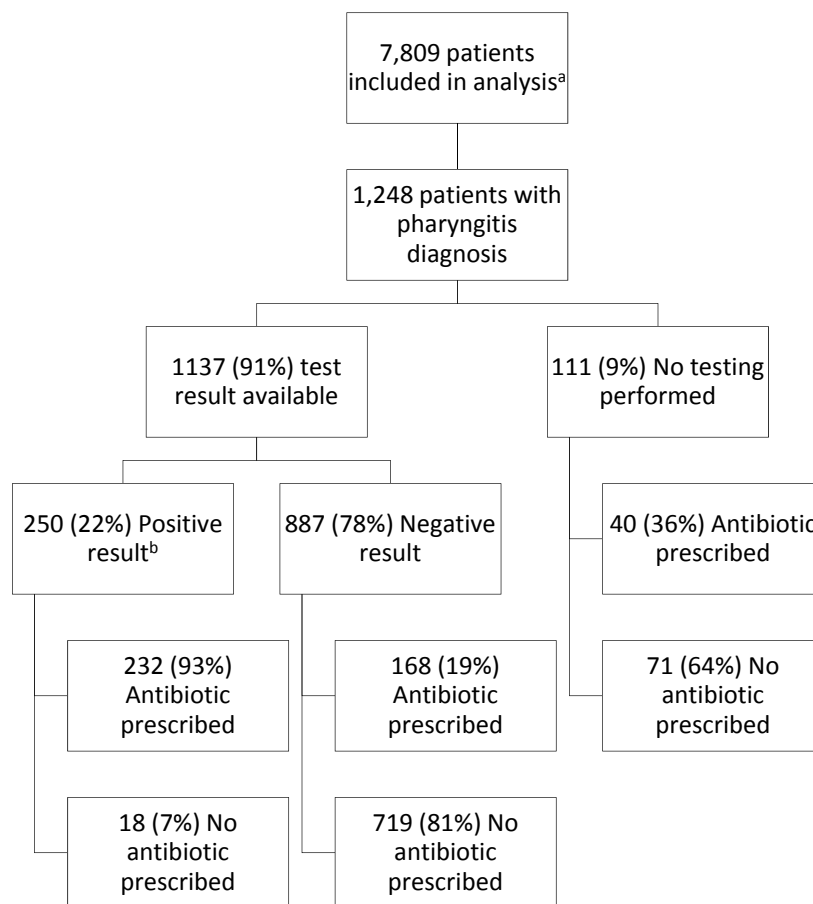

<sup>a</sup> Information on streptococcal testing was available for the 2014-15 season only. One site did not have results from streptococcus testing available and was excluded from this analysis.

<sup>b</sup> Includes positive results from either Group A streptococcus rapid antigen detection test or culture.
